# Supplementary material for: Tilianin content and morphological characterization of colchicine-induced autotetraploids in Agastache mexicana
Source: PeerJ. 2024 Nov 22;12:e18545. doi: 10.7717/peerj.18545 (PMC11587875; doi:10.7717/peerj.18545)
Supplement: Supplemental Information 1 — Each sample was analyzed in triplicate. (mg/g dry weight of the plant) [file peerj-12-18545-s001.xlsx]

## Sheet: Hoja1
Line	tilianin (mg/g DW)
control	6.394
control	6.388
control	6.384
Amx 1	5.572
Amx 1	6.174
Amx 1	6.159
Amx 2	7.945
Amx 2	7.666
Amx 2	7.629
Amx 3	32.961
Amx 3	32.965
Amx 3	32.969
Amx 4	4.852
Amx 4	4.813
Amx 4	4.86
Amx 5	7.196
Amx 5	7.143
Amx 5	7.249
Amx 6	5.022
Amx 6	5.023
Amx 6	5.092
Amx 7	32.394
Amx 7	32.281
Amx 7	32.502
Amx 8	3.192
Amx 8	3.193
Amx 8	3.201
Amx 9	4.407
Amx 9	4.419
Amx 9	4.376
Amx 10	7.31
Amx 10	7.317
Amx 10	7.37
