# Supplementary material for: Tilianin content and morphological characterization of colchicine-induced autotetraploids in Agastache mexicana
Source: PeerJ. 2024 Nov 22;12:e18545. doi: 10.7717/peerj.18545 (PMC11587875; doi:10.7717/peerj.18545)
Supplement: Supplemental Information 2 — DNA content; tilianin content; Chlo T, total chlorophyll; LA, leaf area; FL, flower length; CL, calyx length; L, lightness; C*, chromaticity; h, hue angle. [file peerj-12-18545-s002.xlsx]

## Sheet: Hoja1
Line	Leaf area	Total chlorophyll	Tilianin content	Flower length	Calyx length	L	C	h	DNA content
control	1469	427	6.39443	23.15	9.53	48.43	31.11	317.3	1.43074
control	1131	415	6.38804	22.42	9.51	48.57	30.82	320	1.46211
control	1305	345	6.38352	20.93	10.27	49.13	30.82	317.7	1.43961
Amx 1	961	373	5.57212	32.22	11.85	51.51	25.64	324.7	2.95918
Amx 1	981	354	6.17356	29.31	10.35	50.24	26.31	323	2.95522
Amx 1	706	344	6.15921	31.77	11.48	51.23	27.11	321.3	2.91094
Amx 2	736	414	7.94485	25.69	10.41	50.66	27.7	322	2.60031
Amx 2	1831	389	7.66614	27.46	10.21	48.53	29.72	322.4	2.78122
Amx 2	1305	392	7.62923	26.56	10.95	51.19	28.2	323.5	2.77328
Amx 3	666	468	32.9606	24.62	10.67	47.62	30.66	321.1	2.916
Amx 3	361	474	32.965	32.39	10.91	46.03	30.6	323.3	2.64992
Amx 3	289	226	32.9689	32.81	10.85	45.68	31.28	323.6	2.87933
Amx 4	735	373	4.85151	34.45	10.35	51.1	30.26	318.4	2.74779
Amx 4	847	389	4.81283	32.57	11.29	52.11	31.27	319.5	2.822
Amx 4	1023	375	4.85964	30.06	11.26	53.41	30.49	319.1	2.7169
Amx 5	1277	384	7.19567	31.77	12.36	48.77	30.59	325.3	2.75728
Amx 5	886	373	7.14313	28.78	12.01	54.01	27.78	323.9	2.7069
Amx 5	1361	310	7.24885	31.43	13.17	55.29	25.47	321.8	2.69698
Amx 6	577	371	5.02166	31.89	13.05	53.65	26.47	321.1	2.75773
Amx 6	470	356	5.0227	26.47	12.6	56.58	26.06	318.9	2.89447
Amx 6	528	412	5.0925	32.23	14.48	54.3	26.27	320.7	2.82813
Amx 7	713	382	32.3935	31.89	13.36	50.96	24.91	324.5	2.8598
Amx 7	349	366	32.2813	33.39	12.33	50.58	28.89	321.7	2.8367
Amx 7	430	485	32.5017	31.29	11.49	51.39	27.63	321.9	2.93771
Amx 8	1622	411	3.19249	33.36	11.87	51.87	26.83	324.4	2.70569
Amx 8	1118	396	3.19315	34.92	11.37	52.13	29.92	321.4	2.89328
Amx 8	872	380	3.2005	33.25	12.02	54.56	26.1	322.5	2.95597
Amx 9	749	436	4.40731	28.81	12.3	53.67	28.3	321.8	2.71601
Amx 9	796	434	4.41851	30.08	12.41	53.26	28.16	322.1	2.78641
Amx 9	1194	329	4.376	36.18	12.03	51.31	27.78	323.8	2.86001
Amx 10	647	390	7.31035	30.02	10.57	46.61	32.44	323.5	2.93825
Amx 10	368	330	7.3173	30.5	9.6	46.29	31.12	324.3	3.02737
Amx 10	544	387	7.36979	29.2	11.98	44.44	31.79	323.3	2.67607
