# Supplementary material for: Tilianin content and morphological characterization of colchicine-induced autotetraploids in Agastache mexicana
Source: PeerJ. 2024 Nov 22;12:e18545. doi: 10.7717/peerj.18545 (PMC11587875; doi:10.7717/peerj.18545)
Supplement: Supplemental Information 3 — L, lightness; C, chromaticity; h, hue angle. [file peerj-12-18545-s003.xlsx]

## Sheet: Hoja1
Line	Length flower	Length calyx	L	C	h
Control	23.15	9.53	48.43	31.11	317.3
Control	22.42	9.51	48.57	30.82	320
Control	20.93	10.27	49.13	30.82	317.7
Control	20.54	10.35	50.36	27.73	317.1
Control	21.01	10.56	49.81	32.45	317.9
Control	22.42	11.04	41.9	34.16	320.6
Control	26.07	10.81	43.23	33.17	319.3
Control	25.69	10.52	46.28	35.11	319.1
Control	25.5	19.96	46.73	31.47	320.2
Control	26.73	10.19	46.61	30.05	321.1
Control	23.86	10.98	42.79	33.43	321.3
Control	29.81	12.19	47.12	31.08	319.6
Control	27.4	11.97	44.29	32.15	321.1
Control	29.19	12.04	43.6	35.21	319.8
Control	27.85	12.27	43.15	32.66	321.2
Control	27.72	10.68	46.58	33.32	320.4
Control	26.01	9.85	41.76	34.46	321.7
Control	28.24	10.15	42.9	32.84	321.4
Amx 1	32.22	11.85	51.51	25.64	324.7
Amx 1	29.31	10.35	50.24	26.31	323
Amx 1	31.77	11.48	51.23	27.11	321.3
Amx 1	29.1	10.24	48.74	30.48	321.4
Amx 1	30.42	11.3	47.38	30.32	325.3
Amx 1	30.54	11.52	48.96	29.61	324.7
Amx 1	30.73	11.68	52.67	25.45	317.3
Amx 1	27.53	10.72	54.7	24.2	317.8
Amx 1	30.2	11.9	50.48	29.36	321.4
Amx 1	31.42	11.71	52.99	26.02	319.7
Amx 1	26.42	10.92	55.34	24.29	317.4
Amx 1	31.29	10.38	48.81	27.81	324.4
Amx 1	27.14	10.75	47.66	28.97	323.6
Amx 1	30.25	12.07	50.95	26.25	322.7
Amx 1	27.39	11.89	52.85	26.21	321.7
Amx 1	31.25	11.78	48.67	25.1	322.8
Amx 1	31.44	11.1	50.58	23.33	321
Amx 1	30.98	11.65	53.57	27.09	318.1
Amx 2	25.69	10.41	50.66	27.7	322
Amx 2	27.46	10.21	48.53	29.72	322.4
Amx 2	26.56	10.95	51.19	28.2	323.5
Amx 2	26.2	9.6	50.64	27.25	321.3
Amx 2	23.86	10.83	49.76	29.16	323
Amx 2	25.63	10.77	49.53	29.28	323.7
Amx 2	26.09	10.73	47.33	32.85	322.7
Amx 2	22.26	11.49	52.31	26.98	322.7
Amx 2	26.29	11.24	43.98	28.65	326.7
Amx 2	25.35	12.52	50.01	26.63	323.5
Amx 2	36.56	12.47	48.09	29.54	324.5
Amx 2	22.73	9.78	52.55	26.68	322.6
Amx 2	22.59	10.12	51.75	25.27	323
Amx 2	20.02	8.94	54.29	23.23	323.2
Amx 2	25.63	11.01	50.25	30.75	324.8
Amx 2	19.72	9.97	40.47	34.49	325.8
Amx 2	25.56	10.21	53.01	24.18	320.1
Amx 2	25.69	9.98	59.69	13.94	319.2
Amx 3	24.62	10.67	47.62	30.66	321.1
Amx 3	32.39	10.91	46.03	30.6	323.3
Amx 3	32.81	10.85	45.68	31.28	323.6
Amx 3	32.37	11.18	46.63	30.96	324.6
Amx 3	32.98	10.08	45.72	31.45	323.1
Amx 3	31.28	11.39	46.57	32.88	323.2
Amx 3	29.6	11.06	47.46	29.72	322.3
Amx 3	31.69	11.8	45.73	31.72	326.4
Amx 3	31.6	12.62	49.49	29.02	321.1
Amx 3	26.41	10.78	42.96	33.34	325.1
Amx 3	33.61	12.27	44.76	34.22	322.7
Amx 3	26.77	9.47	47.82	28.86	322.6
Amx 3	31.47	10.72	45.42	28.38	324.2
Amx 3	33.59	11.49	46.16	31.76	323.7
Amx 3	30.96	11.24	46.58	30.37	322.8
Amx 3	30.46	11.17	47.39	30.72	322.6
Amx 3	29.46	10.85	45.8	28.77	322.6
Amx 3	33.09	11.12	42.46	33.89	323.3
Amx 4	34.45	10.35	51.1	30.26	318.4
Amx 4	32.57	11.29	52.11	31.27	319.5
Amx 4	30.06	11.26	53.41	30.49	319.1
Amx 4	29.31	11.63	53.72	27.81	318.6
Amx 4	33.78	10.72	54.31	26.87	318.9
Amx 4	36.56	11.38	52.24	27.62	318.4
Amx 4	28.63	10.6	47.42	33.81	325.3
Amx 4	35.89	12.91	48.89	29.28	323.1
Amx 4	34.25	12.72	45.31	34.18	324.5
Amx 4	26.03	10.05	41.43	34.46	327.1
Amx 4	25.03	11.83	41.13	34.61	325.5
Amx 4	24.53	11.14	48.67	31.31	321.8
Amx 4	32.58	12.42	45.71	34.03	324.5
Amx 4	29.21	10.95	54.27	25.77	323.8
Amx 4	32.88	12.41	50.03	32.68	320.9
Amx 4	31.93	12.24	54.16	27.6	324.3
Amx 4	27.27	11.74	48.97	29.86	322.9
Amx 4	25.03	11.11	50.63	28.52	326
Amx 5	31.77	12.36	48.77	30.59	325.3
Amx 5	28.78	12.01	54.01	27.78	323.9
Amx 5	31.43	13.17	55.29	25.47	321.8
Amx 5	33.18	12.45	50.14	29.92	323.8
Amx 5	27.78	11.91	53.06	27.37	324.4
Amx 5	33.87	13.43	44.29	33.24	327.1
Amx 5	30.46	11.96	49.23	27.69	321.7
Amx 5	31.08	12.5	50.94	28.17	324.2
Amx 5	30.14	12.4	50.96	29.55	322.6
Amx 5	31.91	13.36	51.02	29.78	323.5
Amx 5	32.84	12.55	51.98	28.93	324.7
Amx 5	34.64	12.52	48.87	29.47	323.8
Amx 5	33.3	13.09	52.82	29.55	324.3
Amx 5	33.68	12.98	52.57	27.79	324.3
Amx 5	34.15	13.18	54.75	27.02	324.1
Amx 5	29.69	12.52	49.89	29.15	323.8
Amx 5	31.06	12.06	51.93	27.86	322.7
Amx 5	29.44	12.52	51.77	31.14	324.8
Amx 6	31.89	13.05	53.65	26.47	321.1
Amx 6	26.47	12.6	56.58	26.06	318.9
Amx 6	32.23	14.48	54.3	26.27	320.7
Amx 6	34.15	13.85	53.89	27.68	319.2
Amx 6	32.52	13.64	55.81	25.71	317.2
Amx 6	30.55	14.36	55.55	24.99	318.2
Amx 6	32.28	13.8	54.87	26.11	319.6
Amx 6	28.7	11.49	44.55	32.7	322.8
Amx 6	33.04	13.49	48.08	29.12	322.7
Amx 6	33.24	13.31	48.99	27.76	327.1
Amx 6	29.84	13.14	45.8	32.33	323.5
Amx 6	28.96	12.73	48.84	27.34	324.4
Amx 6	24.13	12.22	49.51	29.28	323.8
Amx 6	30.83	13.27	49.95	29.94	323
Amx 6	31.5	13.74	49.8	28.97	324.2
Amx 6	34.54	15.06	49.09	26.94	324.4
Amx 6	31.48	12.8	49.99	28.36	323.6
Amx 6	31.75	13.22	46.57	27.69	327.1
Amx 7	31.89	13.36	50.96	24.91	324.5
Amx 7	33.39	12.33	50.58	28.89	321.7
Amx 7	31.29	11.49	51.39	27.63	321.9
Amx 7	32.32	11.62	45.25	31.29	324.4
Amx 7	32.13	12.49	42.77	33.26	325.8
Amx 7	30.53	13.2	50.51	27.32	323.9
Amx 7	32.72	12.1	51.05	26.9	323.9
Amx 7	32.63	12.73	53.89	23.7	322.6
Amx 7	33.22	11.22	48.17	29.48	324
Amx 7	32.04	14.49	58.73	20.65	318.7
Amx 7	32.05	10.47	52.1	26.82	323.6
Amx 7	31.98	10.93	53.35	25	322.9
Amx 7	32.55	11.84	52.96	25.38	320.9
Amx 7	32.72	11.02	51.68	27.17	321.5
Amx 7	32.83	12.71	51.55	26.43	321.4
Amx 7	33.39	12.39	48	33.42	323.1
Amx 7	32.5	11.41	53.13	26.82	324
Amx 7	34.2	10.66	54.17	21.77	322.5
Amx 8	33.36	11.87	51.87	26.83	324.4
Amx 8	34.92	11.37	52.13	29.92	321.4
Amx 8	33.25	12.02	54.56	26.1	322.5
Amx 8	35.84	10.98	53.14	28.7	321.7
Amx 8	31.94	11.32	53.81	27.34	322.1
Amx 8	35.97	12.86	53.49	26.87	323.2
Amx 8	35.8	12.47	53.66	25.92	322.4
Amx 8	34.53	11.73	52	26.58	320.2
Amx 8	34.6	12.12	52.31	28.3	321.5
Amx 8	32.36	11.47	53.39	27.96	320.7
Amx 8	34.73	12.25	55.46	25.84	321.4
Amx 8	29.96	11.84	50.77	22.48	346.8
Amx 8	35.92	11.7	52.8	26.4	322.1
Amx 8	33.08	11.72	55.14	24.32	318.5
Amx 8	33.8	12.23	51.96	27.04	324.2
Amx 8	33.85	11.89	53.78	20.65	335.9
Amx 8	35.45	11.99	51.33	29.49	322
Amx 8	34.33	12.26	50.08	27.58	322.7
Amx 9	28.81	12.3	53.67	28.3	321.8
Amx 9	30.08	12.41	53.26	28.16	322.1
Amx 9	36.18	12.03	51.31	27.78	323.8
Amx 9	33.99	13.43	45.58	30.98	326.6
Amx 9	31.92	11.12	51	31.01	321.3
Amx 9	36.69	12.24	50.33	30.13	321.4
Amx 9	30.32	10.9	53.11	29.35	320.1
Amx 9	32.4	12.6	51.56	26.83	320.4
Amx 9	32.14	11.98	55.18	26.83	319.2
Amx 9	23.82	11.07	51.34	27.08	320.5
Amx 9	35.64	11.92	52.54	26.91	321.7
Amx 9	35.67	11.65	52.97	28.52	322.3
Amx 9	26.68	11	52.92	27.08	320.8
Amx 9	31.58	11.36	50	29.53	320.7
Amx 9	33.05	12.23	49.18	29.56	321
Amx 9	36.76	12.29	51.45	30.04	320.5
Amx 9	33.32	10.8	49.19	29.17	322
Amx 9	28.31	11.83	52.76	28.29	320.5
Amx 10	30.02	10.57	46.61	32.44	323.5
Amx 10	30.5	9.6	46.29	31.12	324.3
Amx 10	29.2	11.98	44.44	31.79	323.3
Amx 10	29.9	11.68	47.47	30.95	322.4
Amx 10	30.99	10.64	44.33	32.37	324.9
Amx 10	31.05	11.58	45.77	31.74	323.7
Amx 10	26.86	10.65	45.83	30.99	325.1
Amx 10	27.79	11.12	46.94	30.79	325
Amx 10	31.38	11.9	51.22	29	322.4
Amx 10	24.6	11.14	47	31.89	324.3
Amx 10	27.63	11.1	48.94	27.5	324.5
Amx 10	30.24	11.19	46.06	32.13	324.3
Amx 10	30.23	11.45	47.28	29.4	324.1
Amx 10	27.65	11.03	47.19	31.24	323.5
Amx 10	30.06	11.21	45.84	31.64	325
Amx 10	24.6	10.78	47.02	32.2	324.3
Amx 10	28.59	11.27	45.83	32.27	323.7
Amx 10	26.22	11.14	46.92	31.81	323.8
