# Supplementary material for: Tilianin content and morphological characterization of colchicine-induced autotetraploids in Agastache mexicana
Source: PeerJ. 2024 Nov 22;12:e18545. doi: 10.7717/peerj.18545 (PMC11587875; doi:10.7717/peerj.18545)
Supplement: Supplemental Information 4 [file peerj-12-18545-s004.xlsx]

## Sheet: Hoja1
Line	Leaf area		Linea	Chlorophyll a	Chlorophyll b	Total chlorophyll
control	14.69		control	325	102	427
control	11.31		control	309	106	415
control	13.05		control	268	77	345
control	7.47		control	281	91	372
control	10.77		control	245	67	312
control	7.18		control	269	62	331
control	13.02		control	275	104	379
control	9.08		control	272	73	345
control	4.75		control	275	79	354
control	3.46		control	267	90	357
control	3.87		Amx 1	289	84	373
control	4.09		Amx 1	271	83	354
Amx 1	9.61		Amx 1	264	80	344
Amx 1	9.81		Amx 1	268	85	353
Amx 1	7.06		Amx 1	225	109	334
Amx 1	8.4		Amx 1	311	76	387
Amx 1	8.2		Amx 1	290	89	379
Amx 1	6.67		Amx 1	233	106	339
Amx 1	7.17		Amx 1	287	104	391
Amx 1	11.36		Amx 1	280	101	381
Amx 1	7.88		Amx 2	282	132	414
Amx 1	8.54		Amx 2	255	134	389
Amx 1	10.42		Amx 2	281	111	392
Amx 1	8.04		Amx 2	285	90	375
Amx 2	7.36		Amx 2	270	129	399
Amx 2	18.31		Amx 2	311	117	428
Amx 2	13.05		Amx 2	313	115	428
Amx 2	6.58		Amx 2	334	107	441
Amx 2	9.74		Amx 2	305	122	427
Amx 2	9.23		Amx 2	325	123	448
Amx 2	7.74		Amx 3	364	104	468
Amx 2	9.24		Amx 3	340	134	474
Amx 2	8.65		Amx 3	205	21	226
Amx 2	7.29		Amx 3	266	66	332
Amx 2	5.88		Amx 3	243	17	260
Amx 2	8.77		Amx 3	314	124	438
Amx 3	6.66		Amx 3	303	122	425
Amx 3	3.61		Amx 3	312	117	429
Amx 3	2.89		Amx 3	318	102	420
Amx 3	4.18		Amx 3	314	122	436
Amx 3	3.81		Amx 4	273	100	373
Amx 3	4.45		Amx 4	294	95	389
Amx 3	3.76		Amx 4	277	98	375
Amx 3	3.05		Amx 4	262	97	359
Amx 3	7.25		Amx 4	264	83	347
Amx 3	3.15		Amx 4	266	79	345
Amx 3	4.14		Amx 4	227	78	305
Amx 3	2.88		Amx 4	238	75	313
Amx 4	7.35		Amx 4	226	83	309
Amx 4	8.47		Amx 4	259	82	341
Amx 4	10.23		Amx 5	299	85	384
Amx 4	6.07		Amx 5	288	85	373
Amx 4	7.21		Amx 5	233	77	310
Amx 4	8.8		Amx 5	301	94	395
Amx 4	9.97		Amx 5	325	117	442
Amx 4	8.9		Amx 5	350	95	445
Amx 4	10.75		Amx 5	281	105	386
Amx 4	6.94		Amx 5	303	107	412
Amx 4	6.43		Amx 5	279	99	378
Amx 4	7.34		Amx 5	300	94	394
Amx 5	12.77		Amx 6	284	87	371
Amx 5	8.86		Amx 6	250	106	356
Amx 5	13.61		Amx 6	310	102	412
Amx 5	5.98		Amx 6	305	103	408
Amx 5	3.97		Amx 6	332	102	434
Amx 5	10.11		Amx 6	335	97	432
Amx 5	9.79		Amx 6	366	125	491
Amx 5	11.98		Amx 6	308	109	417
Amx 5	8.42		Amx 6	343	97	440
Amx 5	4.7		Amx 6	359	98	457
Amx 5	4.84		Amx 7	259	123	382
Amx 5	4.36		Amx 7	244	122	366
Amx 6	5.77		Amx 7	361	124	485
Amx 6	4.7		Amx 7	340	117	457
Amx 6	5.28		Amx 7	305	91	396
Amx 6	5.54		Amx 7	329	90	419
Amx 6	4.43		Amx 7	373	125	498
Amx 6	6.77		Amx 7	335	93	428
Amx 6	8.69		Amx 7	293	98	391
Amx 6	4.96		Amx 7	495	118	613
Amx 6	6.04		Amx 8	302	109	411
Amx 6	6.76		Amx 8	295	101	396
Amx 6	5.35		Amx 8	294	86	380
Amx 6	4.26		Amx 8	282	79	361
Amx 7	7.13		Amx 8	281	79	360
Amx 7	3.49		Amx 8	304	99	403
Amx 7	4.3		Amx 8	273	74	347
Amx 7	3.39		Amx 8	301	82	383
Amx 7	3.39		Amx 8	302	89	391
Amx 7	3.61		Amx 8	307	98	405
Amx 7	6.45		Amx 9	324	112	436
Amx 7	4.01		Amx 9	329	105	434
Amx 7	6.25		Amx 9	256	73	329
Amx 7	4.63		Amx 9	273	74	347
Amx 7	3.79		Amx 9	293	96	389
Amx 7	4.41		Amx 9	309	97	406
Amx 8	16.22		Amx 9	293	84	377
Amx 8	11.18		Amx 9	294	80	374
Amx 8	8.72		Amx 9	298	85	383
Amx 8	8.61		Amx 9	295	86	381
Amx 8	15.61		Amx 10	288	102	390
Amx 8	11.77		Amx 10	294	36	330
Amx 8	7.91		Amx 10	292	95	387
Amx 8	10.58		Amx 10	354	134	488
Amx 8	7.13		Amx 10	311	106	417
Amx 8	10.6		Amx 10	317	103	420
Amx 9	7.49		Amx 10	325	105	430
Amx 9	7.96		Amx 10	318	38	356
Amx 9	11.94		Amx 10	350	131	481
Amx 9	11.38		Amx 10	297	119	416
Amx 9	9.91
Amx 9	9.55
Amx 9	4.05
Amx 9	11.15
Amx 9	9.74
Amx 9	3.58
Amx 10	6.47
Amx 10	3.68
Amx 10	5.44
Amx 10	3.82
Amx 10	7.5
Amx 10	4.77
Amx 10	4.18
Amx 10	4.35
Amx 10	4.37
Amx 10	4.72
